# Supplementary material
Source: publisher figshare collection journal article supplement (https://wiley.figshare.com/articles/dataset/_/3564126)
Supplement: Supplementary file 1 [file 1]

## APPENDIX D

### *Mass (M)*

Adult female mass was estimated using the equation:  $M = bL^3$  (Rice and Wolman 1971), based on weights from nine gray whales, from neonates to adults, where  $b = 12.43 \pm 1.56$ . The value of  $b$  was calculated from lengths and girths of 27 southbound recently ovulated gray whales (Rice and Wolman 1971). Data for  $L$  was obtained from 107 harvested recently ovulated/early pregnant, anestrus and late pregnant/post-partum adult female gray whales (Rice and Wolman 1971).

Data to estimate calves' mass from Eq. 4 ( $M = 28.5 \cdot G^{1.17} \cdot L^{1.73}$ ) (main text) was obtained from 12 sets of weight, length and girth from a 3-63 weeks of age captive gray whale ("JJ") (Sumich et al. 2001).

The girth-to-length ratio for newborn calves was based on data obtained from five live neonates (Norris and Gentry 1974, Sumich 1986) and data for the girth-to-length ratio for older calves was obtained from measurements of a captive gray whale ("Gigi II") at two and 14 months of age ((Sumich 1986) and (J. L. Sumich, *unpublished*)). Length was estimated as previously described in *Tidal lung volume* section.

### LITERATURE CITED

- Norris, K. S., and R. L. Gentry. 1974. Capture and harnessing of young California gray whales, *Eschrichtius robustus*. Marine Fisheries Review 36:58–64.
- Rice, D. W., and A. A. Wolman. 1971. The life history and ecology of the gray whale (*Eschrichtius robustus*). Special Publication No. 3. American Society of Mammalogists, Washington, D.C., USA.

Sumich, J. L. 1986. Latitudinal distribution, calf growth and metabolism, and reproductive energetics of gray whales, *Eschrichtius robustus*. Dissertation. Oregon State University, Corvallis, Oregon, USA.

Sumich, J. L., T. Goff, and W. L. Perryman. 2001. Growth of two captive gray whale calves. *Aquatic Mammals* 27:231–233.
